# Supplementary material
Source: publisher figshare collection journal article supplement (https://acs.figshare.com/ndownloader/files/5687571)
Supplement: Supplementary file 1 [file 5687571]

# ic000334p.cif

data_IC000334P
_audit_creation_date        99-03-12
_audit_creation_method CRYSTALS_ver_07-07-97

_publ_contact_letter
;
     Please consider this CIF submission for publication as a Abbreviated 
     Structure Report in Inorganic Chemistry
    
;
_publ_contact_author_name                       'Pr David J. Aitken'
_publ_contact_author_address
;
Laboratoire SEESIB associ\'e au CNRS-UMR 6504, D\'epartement de Chimie,
Universit\'e Blaise Pascal (Clermont-Ferrand II), 24 avenue des Landais,
63177 Aubi\`ere cedex, France
;
_publ_contact_author_phone                      ' 0473407184 '
_publ_contact_author_fax                        ' 0473407717 '
_publ_contact_author_email        ' aitken@chisg1.univ-bpclermont.fr '
_publ_requested_journal                         'Inorganic Chemistry'
_publ_section_title
;
Effects of ring-size on coordination properties of
trans-1,2-diaminocycloalkane ligands: synthesis of dinuclear Platinum(II)
Complexes designed for forming long-range DNA crosslinks.
_publ_author_name
_publ_author_address
'Sandrine Ongeri'
 Laboratoire de Chimie Th\'erapeutique associ\'e au CNRS-UMR 8638,
 Universit\'e Ren\'e Descartes (Paris V), 4 avenue de l'Observatoire
 75270 Paris cedex 06, France
'David J. Aitken'
 Laboratoire SEESIB associ\'e au CNRS-UMR 6504, D\'epartement de Chimie,
 Universit\'e Blaise Pascal (Clermont-Ferrand II), 24 avenue des Landais,
 63177 Aubi\`ere cedex, France
'Henri-Philippe Husson'
 Laboratoire de Chimie Th\'erapeutique associ\'e au CNRS-UMR 8638,
 Universit\'e Ren\'e Descartes (Paris V), 4 avenue de l'Observatoire
 75270 Paris cedex 06, France
'Jiri Kozelka'
 Laboratoire de Chimie et Biochimie Pharmacologiques et Toxicologiques
 associ\'e au CNRS-UMR 8601, Universit\'e Ren\'e Descartes (Paris V),
 45 rue des Saints-P\`eres, 75270 Paris cedex 06, France
'Bernard Viossat'
 Laboratoire de Chimie G\'en\'erale, Facult\'e de M\'edecine et de Pharmacie,
 Universit\'e de Poitiers, 34 rue du Jardin des Plantes, BP199,
 Poitiers cedex, France
       
_publ_section_abstract  #Text of the abstract
;
?
;
_publ_section_comment  #Text of the paper
;
?
;
_publ_section_acknowledgements  # Acknowledgments
;
?
;
_publ_section_figure_captions  #Captions to figures
;
?
;
_publ_section_figure_synopsis  #synopsis for materials not shown as diagram
;
?
;
_publ_section_exptl_refinement
# see also _refine_ls_hydrogen for refinement keywords.
;
 H atoms placed geometrically after each cycle
;
_publ_section_exptl_prep
;
 ?
;
## -----------------REFERENCES ----------------------##
_publ_section_references                                                
;
Altomare, A., Cascarano, G., Giacovazzo G., Guagliardi A., Burla M.C.,
Polidori, G.  & Camalli, M. (1994) SIR92 - a program for automatic solution of
crystal structures by direct methods. J. Appl. Cryst. (27), 435-435
 
Carruthers, J.R. and Watkin, D.J. (1979),
Acta Cryst, A35, 698-699

Stoe and Cie (1996) IPDS Manual.Version 2.75. Stoe and Cie, Darmstadt,
Germany.
 
Watkin, D.J., Prout, C.K. Carruthers, J.R. & Betteridge, P.W. (1996) CRYSTALS
Issue 10. Chemical Crystallography Laboratory, OXFORD, UK.
 
Watkin, D.J., Prout, C.K. & Pearce, L.J. (1996) CAMERON, Chemical
Crystallography Laboratory, OXFORD, UK.
 
;
_diffrn_radiation_monochromator      graphite
_diffrn_measurement_device_type     'Stoe and Cie (1996)'
_computing_data_collection 'Stoe and Cie (1996)'
_computing_data_reduction  'Stoe and Cie (1996)'
_computing_cell_refinement 'CAD-4 software (Enraf-Nonius, 1989)'
#==========================================================================
# General computing
#==========================================================================
_computing_structure_refinement 'CRYSTALS Issue 10 (Watkin & al., 1996)'
_computing_publication_material 'CRYSTALS Issue 10 (Watkin & al., 1996)'
_computing_molecular_graphics 'CAMERON (Watkin & al.,  1996)'
_computing_structure_solution 'SIR92 (Altomare al., 1992)'
 
#==========================================================================
_chemical_name_systematic       
;
 (SP-4-3)-chloro(trans-cyclohexane-1,2-diamine-N,N')(dimethylsulfoxyde-S)
 platinum(II) trichloro(dimethylsulfoxyde-S)platinate
;
_refine_ls_matrix_type                      full
_atom_sites_solution_primary                direct
_atom_sites_solution_hydrogens              geom
_refine_ls_hydrogen_treatment               noref
_cell_length_a 10.345(2)
_cell_angle_alpha 90.0
_cell_length_b 11.306(1)
_cell_angle_beta  98.93(2)
_cell_length_c 18.083(2)
_cell_angle_gamma 90.0
_cell_volume   2089.3
_symmetry_cell_setting 'Monoclinic '
_symmetry_space_group_name_H-M 'P 1 21/n 1 '
loop_
 _symmetry_equiv_pos_as_xyz
 'x,y,z'
 '-x,-y,-z'
 '-x+1/2,y+1/2,-z+1/2'
 'x+1/2,-y+1/2,z+1/2'
loop_
_atom_type_symbol
_atom_type_scat_dispersion_real
_atom_type_scat_dispersion_imag
_atom_type_scat_Cromer_Mann_a1
_atom_type_scat_Cromer_Mann_b1
_atom_type_scat_Cromer_Mann_a2
_atom_type_scat_Cromer_Mann_b2
_atom_type_scat_Cromer_Mann_a3
_atom_type_scat_Cromer_Mann_b3
_atom_type_scat_Cromer_Mann_a4
_atom_type_scat_Cromer_Mann_b4
_atom_type_scat_Cromer_Mann_c
_atom_type_scat_source
 'C   '    0.0020    0.0020    2.3100   20.8439
    1.0200   10.2075    1.5886    0.5687    0.8650   51.6512    0.2156
'International_Tables_Vol_IV_Table_2.2B'
 'H   '    0.0000    0.0000    0.4930   10.5109
    0.3229   26.1257    0.1402    3.1424    0.0408   57.7997    0.0030
'International_Tables_Vol_IV_Table_2.2B'
 'Cl  '    0.1320    0.1590   11.4604    0.0104
    7.1964    1.1662    6.2556   18.5194    1.6455   47.7784   -9.5574
'International_Tables_Vol_IV_Table_2.2B'
 'N   '    0.0040    0.0030   12.2126    0.0057
    3.1322    9.8933    2.0125   28.9975    1.1663    0.5826  -11.5290
'International_Tables_Vol_IV_Table_2.2B'
 'O   '    0.0080    0.0060    3.0485   13.2771
    2.2868    5.7011    1.5463    0.3239    0.8670   32.9089    0.2508
'International_Tables_Vol_IV_Table_2.2B'
 'S   '    0.1100    0.1240    6.9053    1.4679
    5.2034   22.2151    1.4379    0.2536    1.5863   56.1720    0.8669
'International_Tables_Vol_IV_Table_2.2B'
 'Pt  '   -2.3520    8.3880   27.0059    1.5129
   17.7639    8.8117   15.7131    0.4246    5.7837   38.6103   11.6883
'International_Tables_Vol_IV_Table_2.2B'
_chemical_formula_sum
' C10 H26 CL4 N2 O2 Pt2 S2 '
_chemical_formula_moiety
' C10 H26 CL4 N2 O2 Pt2 S2 '
_chemical_compound_source
;
?
;
_chemical_formula_weight   802.44
_cell_measurement_reflns_used      259 
_cell_measurement_theta_min        1.65
_cell_measurement_theta_max        26.05
_cell_measurement_temperature      293 (2)  
_cell_formula_units_Z   4
_exptl_crystal_description ' parallelepipedic '
_exptl_crystal_colour ' yellow '
_exptl_crystal_size_min 0.125
_exptl_crystal_size_mid 0.125
_exptl_crystal_size_max 0.325
_exptl_crystal_density_diffrn 2.55
_exptl_crystal_density_meas 'not measured'
_exptl_crystal_F_000 1473.61        
_exptl_absorpt_coefficient_mu 14.23
_exptl_absorpt_correction_type none
_diffrn_standards_interval_time 0   
_diffrn_standards_interval_count 0  
_diffrn_standards_number 200       
_diffrn_standards_decay_% 0.00      
_diffrn_ambient_temperature    293 (2)
_diffrn_reflns_number 4067
_reflns_number_total 19783
_diffrn_reflns_av_R_equivalents 0.10
_reflns_number_observed 3353
_diffrn_reflns_theta_min 1.65
_diffrn_reflns_theta_max 26.05
_diffrn_reflns_limit_h_min -12
_diffrn_reflns_limit_h_max 12
_diffrn_reflns_limit_k_min 0
_diffrn_reflns_limit_k_max 13
_diffrn_reflns_limit_l_min 0
_diffrn_reflns_limit_l_max 22
_reflns_observed_criterion  >2.00\s(I)
_refine_diff_density_min -3.40
_refine_diff_density_max 2.84
_refine_ls_number_reflns 3353
_refine_ls_number_parameters 216
_refine_ls_R_factor_obs 0.0382
_refine_ls_wR_factor_obs 0.0395
_refine_ls_goodness_of_fit_obs 1.0110
_refine_ls_shift/su_max 2.246994
_refine_ls_structure_factor_coef F
_refine_ls_weighting_scheme calc
_refine_ls_weighting_details
;
 Chebychev polynomial with   3 parameters (Carruthers & Watkin, 1979)
 2.22 0.935E-01 1.92
;
_diffrn_radiation_type       'Mo K\a'
_diffrn_radiation_wavelength      0.71073
_diffrn_measurement_method \w/2\q
 
 
loop_
_atom_site_label
_atom_site_fract_x
_atom_site_fract_y
_atom_site_fract_z
_atom_site_U_iso_or_equiv
_atom_site_occupancy
_atom_site_thermal_displace_type
Pt1 0.31509(2) 0.180268(19) 0.266625(12) 0.0239 1.0000 Uani
S1 0.22878(16) 0.09620(13) 0.35748(9) 0.0308 1.0000 Uani
Cl11 0.44800(18) 0.29889(16) 0.3486(1) 0.0433 1.0000 Uani
O1 0.1321(5) 0.0033(5) 0.3323(3) 0.0469 1.0000 Uani
N1 0.3947(7) 0.2439(5) 0.1764(4) 0.0347 1.0000 Uani
N2 0.2018(6) 0.0851(6) 0.1849(3) 0.0355 1.0000 Uani
C1 0.3156(7) 0.2040(6) 0.1047(4) 0.0366 1.0000 Uani
C2 0.3926(8) 0.2096(7) 0.0406(4) 0.0465 1.0000 Uani
C3 0.3138(11) 0.153(1) -0.0300(4) 0.0692 1.0000 Uani
C4 0.2672(12) 0.0320(9) -0.0158(5) 0.0686 1.0000 Uani
C5 0.1840(8) 0.0331(7) 0.0486(4) 0.0479 1.0000 Uani
C6 0.2681(7) 0.0804(6) 0.1173(4) 0.0363 1.0000 Uani
C11 0.1531(8) 0.2004(8) 0.4101(4) 0.0458 1.0000 Uani
C12 0.3509(8) 0.0349(7) 0.4268(4) 0.0431 1.0000 Uani
H1 0.398(6) 0.279(5) 0.184(4) 0.026(12) 1.0000 Uiso
H2 0.471(9) 0.212(7) 0.187(5) 0.04(2) 1.0000 Uiso
H3 0.142(9) 0.108(7) 0.181(5) 0.058(19) 1.0000 Uiso
H4 0.202(16) 0.023(16) 0.20(1) 0.01(6) 1.0000 Uiso
Pt2 0.63963(2) -0.10472(2) 0.329683(13) 0.0274 1.0000 Uani
S2 0.69594(14) 0.03240(14) 0.25485(8) 0.0300 1.0000 Uani
Cl21 0.4395(2) -0.1330(2) 0.25738(13) 0.0579 1.0000 Uani
Cl22 0.5813(2) -0.24889(19) 0.40941(12) 0.0549 1.0000 Uani
Cl23 0.8381(2) -0.0815(3) 0.40482(13) 0.0769 1.0000 Uani
O2 0.6028(5) 0.0694(5) 0.1895(3) 0.0479 1.0000 Uani
C21 0.746(1) 0.1625(7) 0.3065(6) 0.0567 1.0000 Uani
C22 0.8429(7) -0.0069(7) 0.2228(4) 0.0426 1.0000 Uani
H11 0.2440 0.2583 0.0917 0.0402 1.0000 Uiso
H21 0.4109 0.2908 0.0300 0.0521 1.0000 Uiso
H22 0.4745 0.1647 0.0538 0.0521 1.0000 Uiso
H31 0.3716 0.1463 -0.0681 0.0606 1.0000 Uiso
H32 0.2402 0.2044 -0.0482 0.0606 1.0000 Uiso
H41 0.3370 -0.0208 -0.0043 0.0718 1.0000 Uiso
H42 0.2074 0.0069 -0.0624 0.0718 1.0000 Uiso
H51 0.1540 -0.0458 0.0575 0.0492 1.0000 Uiso
H52 0.1057 0.0858 0.0352 0.0492 1.0000 Uiso
H61 0.3399 0.0251 0.1259 0.0396 1.0000 Uiso
H111 0.0854 0.2413 0.3787 0.0548 1.0000 Uiso
H112 0.2218 0.2572 0.4331 0.0548 1.0000 Uiso
H113 0.1200 0.1585 0.4508 0.0548 1.0000 Uiso
H121 0.4004 -0.0254 0.4049 0.0494 1.0000 Uiso
H122 0.4104 0.0978 0.4491 0.0494 1.0000 Uiso
H123 0.3086 -0.0009 0.4668 0.0494 1.0000 Uiso
H211 0.6711 0.1947 0.3261 0.0672 1.0000 Uiso
H212 0.8174 0.1450 0.3445 0.0672 1.0000 Uiso
H213 0.7733 0.2208 0.2701 0.0672 1.0000 Uiso
H221 0.8267 -0.0807 0.1930 0.0457 1.0000 Uiso
H222 0.9105 -0.0199 0.2649 0.0457 1.0000 Uiso
H223 0.8664 0.0559 0.1905 0.0457 1.0000 Uiso
loop_
_atom_site_aniso_label
_atom_site_aniso_U_11
_atom_site_aniso_U_22
_atom_site_aniso_U_33
_atom_site_aniso_U_23
_atom_site_aniso_U_13
_atom_site_aniso_U_12
Pt1 0.02353(11) 0.02532(11) 0.02324(11) -0.00218(8) 0.00465(9) -0.00029(8)
S1 0.0311(7) 0.0343(8) 0.0274(7) -0.0012(6) 0.0061(6) -0.0021(6)
Cl11 0.0440(9) 0.0480(9) 0.0391(8) -0.0149(7) 0.0100(7) -0.0149(7)
O1 0.046(3) 0.045(3) 0.049(3) 0.000(2) 0.008(2) -0.016(2)
N1 0.041(3) 0.031(3) 0.033(3) -0.004(2) 0.009(2) 0.001(2)
N2 0.028(3) 0.046(3) 0.033(3) -0.001(2) 0.006(2) -0.006(2)
C1 0.035(3) 0.043(3) 0.032(3) 0.006(3) 0.002(3) 0.001(3)
C2 0.058(5) 0.055(4) 0.027(3) 0.006(3) 0.007(3) -0.007(4)
C3 0.091(7) 0.095(7) 0.020(3) 0.006(4) 0.003(4) -0.031(6)
C4 0.108(8) 0.066(6) 0.034(4) -0.016(4) 0.019(4) -0.035(6)
C5 0.060(5) 0.049(4) 0.031(3) -0.002(3) -0.005(3) -0.015(4)
C6 0.043(4) 0.036(3) 0.029(3) -0.004(2) 0.004(3) -0.002(3)
C11 0.045(4) 0.061(5) 0.035(4) -0.002(3) 0.016(3) 0.012(3)
C12 0.051(4) 0.046(4) 0.029(3) 0.010(3) -0.001(3) 0.007(4)
Pt2 0.02716(11) 0.03009(12) 0.02524(11) 0.00066(9) 0.00494(9) 0.00345(9)
S2 0.0281(7) 0.0326(7) 0.0292(7) 0.0021(6) 0.0044(5) 0.0056(6)
Cl21 0.047(1) 0.0671(12) 0.0537(11) -0.000(1) -0.0122(9) -0.021(1)
Cl22 0.0669(12) 0.049(1) 0.051(1) 0.0149(9) 0.0164(9) -0.0036(9)
Cl23 0.037(1) 0.139(2) 0.0487(11) 0.0407(14) -0.0111(9) -0.0134(12)
O2 0.038(3) 0.060(3) 0.043(3) 0.021(2) -0.003(2) 0.011(2)
C21 0.072(6) 0.033(4) 0.068(5) -0.007(4) 0.020(5) 0.004(4)
C22 0.035(3) 0.055(4) 0.041(4) -0.000(3) 0.016(3) 0.009(3)
_refine_ls_extinction_method
    'None'
loop_
 _geom_bond_atom_site_label_1
 _geom_bond_site_symmetry_1
 _geom_bond_atom_site_label_2
 _geom_bond_site_symmetry_2
 _geom_bond_distance
 _geom_bond_publ_flag
Pt1 . S1 . 2.2034(15)    yes
Pt1 . Cl11 . 2.2921(17)    yes
Pt1 . N1 . 2.067(6)    yes
Pt1 . N2 . 2.044(6)    yes
S1 . O1 . 1.473(5)    yes
S1 . C11 . 1.771(7)    yes
S1 . C12 . 1.777(7)    yes
N1 . C1 . 1.492(9)    yes
N1 . H1 . 0.42(6)    no
N1 . H2 . 0.87(9)    no
N2 . C6 . 1.493(9)    yes
N2 . H3 . 0.66(9)    no
N2 . H4 . 0.78(18)    no
C1 . C2 . 1.51(1)    yes
C1 . C6 . 1.511(9)    yes
C1 . H11 . 0.963(7)    no
C2 . C3 . 1.546(11)    yes
C2 . H21 . 0.963(8)    no
C2 . H22 . 0.984(9)    no
C3 . C4 . 1.482(14)    yes
C3 . H31 . 0.98(1)    no
C3 . H32 . 0.977(12)    no
C4 . C5 . 1.552(12)    yes
C4 . H41 . 0.935(13)    no
C4 . H42 . 1.005(9)    no
C5 . C6 . 1.500(9)    yes
C5 . H51 . 0.965(8)    no
C5 . H52 . 1.005(9)    no
C6 . H61 . 0.964(7)    no
C11 . H111 . 0.951(8)    no
C11 . H112 . 0.999(9)    no
C11 . H113 . 0.981(8)    no
C12 . H121 . 0.973(8)    no
C12 . H122 . 0.984(8)    no
C12 . H123 . 0.988(7)    no
Pt2 . S2 . 2.1951(15)    yes
Pt2 . Cl21 . 2.2933(19)    yes
Pt2 . Cl22 . 2.3171(18)    yes
Pt2 . Cl23 . 2.294(2)    yes
S2 . O2 . 1.465(5)    yes
S2 . C21 . 1.775(9)    yes
S2 . C22 . 1.766(7)    yes
C21 . H211 . 0.970(9)    no
C21 . H212 . 0.950(11)    no
C21 . H213 . 1.003(9)    no
C22 . H221 . 0.993(8)    no
C22 . H222 . 0.960(8)    no
C22 . H223 . 0.974(8)    no
loop_
 _geom_angle_atom_site_label_1
 _geom_angle_site_symmetry_1
 _geom_angle_atom_site_label_2
 _geom_angle_site_symmetry_2
 _geom_angle_atom_site_label_3
 _geom_angle_site_symmetry_3
 _geom_angle
 _geom_angle_publ_flag
S1 . Pt1 . Cl11 . 92.41(6)    yes
S1 . Pt1 . N1 . 174.63(16)    yes
Cl11 . Pt1 . N1 . 91.96(18)    yes
S1 . Pt1 . N2 . 93.37(17)    yes
Cl11 . Pt1 . N2 . 174.10(18)    yes
N1 . Pt1 . N2 . 82.3(2)    yes
Pt1 . S1 . O1 . 114.3(2)    yes
Pt1 . S1 . C11 . 112.2(3)    yes
O1 . S1 . C11 . 107.7(4)    yes
Pt1 . S1 . C12 . 111.6(3)    yes
O1 . S1 . C12 . 108.3(3)    yes
C11 . S1 . C12 . 101.9(4)    yes
Pt1 . N1 . C1 . 110.4(5)    yes
Pt1 . N1 . H1 . 96.3(91)    no
C1 . N1 . H1 . 124.4(96)    no
Pt1 . N1 . H2 . 97.9(54)    no
C1 . N1 . H2 . 115.2(55)    no
H1 . N1 . H2 . 107.7(108)    no
Pt1 . N2 . C6 . 109.0(4)    yes
Pt1 . N2 . H3 . 106.9(74)    no
C6 . N2 . H3 . 117.6(73)    no
Pt1 . N2 . H4 . 100.7(127)    no
C6 . N2 . H4 . 111.3(127)    no
H3 . N2 . H4 . 109.8(127)    no
N1 . C1 . C2 . 111.9(6)    yes
N1 . C1 . C6 . 107.2(5)    yes
C2 . C1 . C6 . 112.2(6)    yes
N1 . C1 . H11 . 108.5(6)    no
C2 . C1 . H11 . 105.4(6)    no
C6 . C1 . H11 . 111.8(6)    no
C1 . C2 . C3 . 110.2(7)    yes
C1 . C2 . H21 . 109.7(7)    no
C3 . C2 . H21 . 109.1(7)    no
C1 . C2 . H22 . 109.4(6)    no
C3 . C2 . H22 . 107.9(8)    no
H21 . C2 . H22 . 110.6(8)    no
C2 . C3 . C4 . 112.6(7)    yes
C2 . C3 . H31 . 108.0(9)    no
C4 . C3 . H31 . 107.8(10)    no
C2 . C3 . H32 . 108.1(9)    no
C4 . C3 . H32 . 110.7(10)    no
H31 . C3 . H32 . 109.6(8)    no
C3 . C4 . C5 . 110.9(8)    yes
C3 . C4 . H41 . 111.3(10)    no
C5 . C4 . H41 . 109.7(8)    no
C3 . C4 . H42 . 106.8(8)    no
C5 . C4 . H42 . 106.9(9)    no
H41 . C4 . H42 . 111.1(9)    no
C4 . C5 . C6 . 107.9(7)    yes
C4 . C5 . H51 . 110.3(8)    no
C6 . C5 . H51 . 110.6(6)    no
C4 . C5 . H52 . 110.1(7)    no
C6 . C5 . H52 . 109.4(7)    no
H51 . C5 . H52 . 108.7(8)    no
N2 . C6 . C1 . 107.0(5)    yes
N2 . C6 . C5 . 114.2(6)    yes
C1 . C6 . C5 . 111.4(6)    yes
N2 . C6 . H61 . 109.4(6)    no
C1 . C6 . H61 . 111.4(6)    no
C5 . C6 . H61 . 103.6(6)    no
S1 . C11 . H111 . 110.4(6)    no
S1 . C11 . H112 . 107.8(6)    no
H111 . C11 . H112 . 110.3(8)    no
S1 . C11 . H113 . 108.5(6)    no
H111 . C11 . H113 . 111.9(8)    no
H112 . C11 . H113 . 107.8(7)    no
S1 . C12 . H121 . 110.4(5)    no
S1 . C12 . H122 . 109.7(5)    no
H121 . C12 . H122 . 109.7(8)    no
S1 . C12 . H123 . 109.2(6)    no
H121 . C12 . H123 . 109.4(7)    no
H122 . C12 . H123 . 108.4(7)    no
S2 . Pt2 . Cl21 . 92.85(7)    yes
S2 . Pt2 . Cl22 . 179.56(7)    yes
Cl21 . Pt2 . Cl22 . 87.56(8)    yes
S2 . Pt2 . Cl23 . 89.17(7)    yes
Cl21 . Pt2 . Cl23 . 177.98(8)    yes
Cl22 . Pt2 . Cl23 . 90.42(8)    yes
Pt2 . S2 . O2 . 119.6(2)    yes
Pt2 . S2 . C21 . 110.1(3)    yes
O2 . S2 . C21 . 106.8(4)    yes
Pt2 . S2 . C22 . 110.4(3)    yes
O2 . S2 . C22 . 107.4(3)    yes
C21 . S2 . C22 . 100.7(4)    yes
S2 . C21 . H211 . 108.7(8)    no
S2 . C21 . H212 . 109.8(6)    no
H211 . C21 . H212 . 112.9(9)    no
S2 . C21 . H213 . 106.8(7)    no
H211 . C21 . H213 . 108.4(8)    no
H212 . C21 . H213 . 110.0(10)    no
S2 . C22 . H221 . 107.9(6)    no
S2 . C22 . H222 . 109.7(5)    no
H221 . C22 . H222 . 110.0(7)    no
S2 . C22 . H223 . 108.7(6)    no
H221 . C22 . H223 . 108.9(7)    no
H222 . C22 . H223 . 111.6(8)    no

#===END
